# Supplementary material
Source: PubMed Central journal article supplement (PMC3352239)
Supplement: NIHMS368453-supplement-1_si_001.pdf [file NIHMS368453-supplement-1_si_001.pdf]

## **Supporting Information for**

### **Retene Emission from Residential Solid Fuels in China and Evaluation of Retene as a Unique Marker for Soft Wood Combustion**

Guofeng SHEN<sup>1</sup>, Shu TAO<sup>1\*</sup>, Siye WEI<sup>1</sup>, Yanyan ZHANG<sup>1</sup>, Wen WEI<sup>1</sup>, Rong WANG<sup>1</sup>, Bin WANG<sup>1</sup>, Wei LI<sup>1</sup>, Huizhong SHEN<sup>1</sup>, Ye HUANG<sup>1</sup>, Yifeng YANG<sup>1</sup>, Wei WANG<sup>1</sup>, Xilong WANG<sup>1</sup>, Xuejun WANG<sup>1</sup>, Staci L. MASSEY SIMONICH<sup>2</sup>

*1. Laboratory for Earth Surface Processes, College of Urban and Environmental Sciences, Peking University, Beijing 100871, China.*

*2. Environmental and Molecular Toxicology and Department of Chemistry, Oregon State University, Corvallis, Oregon, USA*

\* Corresponding author phone and fax: 0086-10-62751938, email: [taos@pku.edu.cn](mailto:taos@pku.edu.cn)

There are 5 figures and 5 tables

**Table S1** Measured fuel properties of Coal. The elemental and proximate analysis were conducted by the Analytical Instrumentation Center, Peking University and China National Coal Quality Supervision Testing Center.

| COAL | Type      | N, % | C, % | H, % | Moisture, % | Ash, % | VM %  | FC %  | HV, MJ/kg |
|------|-----------|------|------|------|-------------|--------|-------|-------|-----------|
| BJ   | honeycomb | 0.39 | 65.5 | 0.84 | 1.26        | 27.41  | 3.99  | 65.94 | 22.42     |
| TY-A | honeycomb | 0.36 | 24.0 | 1.73 | 2.18        | 61.72  | 14.73 | 19.71 | 8.73      |
| TY-B | Chunk     | 1.24 | 81.2 | 4.48 | 0.72        | 7.78   | 22.82 | 68.89 | 33.01     |
| YL-A | Chunk     | 0.95 | 72.9 | 4.33 | 3.73        | 15.3   | 27.98 | 55.38 | 28.15     |
| YL-B | Chunk     | 0.72 | 59.9 | 4.59 | 9.17        | 4.45   | 28.49 | 54.96 | 24.19     |

**Table S2** Measured fuel properties of Crop residue. The elemental analysis were conducted by the Analytical Instrumentation Center, Peking University. Data shown are means of duplicated measurements.

| Crop straw |                          | C, %  | H, % | N, % | O, %  | Moisture, % |
|------------|--------------------------|-------|------|------|-------|-------------|
| Horsebean  | <i>Vicia faba</i>        | 43.10 | 7.39 | 0.86 | 48.65 | 2.84        |
| Peanut     | <i>Arachis hypogaea</i>  | 40.37 | 6.75 | 2.27 | 50.61 | 3.25        |
| Soybean    | <i>Cassia agnes</i>      | 42.33 | 7.55 | 0.86 | 49.26 | 2.79        |
| Cotton     | <i>Anemone vitifolia</i> | 44.38 | 7.35 | 1.10 | 47.17 | 3.34        |
| Rice       | <i>Oryza sativa</i>      | 38.69 | 6.26 | 0.87 | 54.18 | 3.92        |
| Wheat      | <i>Triticum aestivum</i> | 42.61 | 6.67 | 0.27 | 50.45 | 1.41        |
| Rape       | <i>Brassica napus</i>    | 41.25 | 6.99 | 0.45 | 51.31 | 2.22        |
| Seasame    | <i>Sesamum indicum</i>   | 43.20 | 7.34 | 1.73 | 47.73 | 2.46        |
| Corn       | <i>Zea mays</i>          | 44.46 | 7.08 | 1.54 | 46.92 | 2.53        |
| Broomcorn  | <i>Sorghum Moench</i>    | 45.82 |      |      |       | 6.82        |
| Pea straw  | <i>Pisum Linn.</i>       | 41.16 |      |      |       | 7.87        |

**Table S3** Measured fuel properties of Wood. The elemental contents were measured by the Analytical Instrumentation Center, Peking University. Proximate analysis were conducted by Chinese Academy of Agricultural Engineering following the national standard methods.

| WOOD                 |                                | Density, g/cm <sup>3</sup> | ash, % | VM, % | FC, % | HHV, MJ/kg | N, % | C, %  | H, % | O, %  |
|----------------------|--------------------------------|----------------------------|--------|-------|-------|------------|------|-------|------|-------|
| Chinese White Poplar | <i>Populus tomentosa Carr.</i> | 0.463                      | 0.90   | 81.69 | 17.41 | 18.35      | 0.08 | 47.75 | 6.15 | 46.03 |
| Elm                  | <i>Ulmus pumila L.</i>         | 0.536                      | 1.50   | 78.56 | 19.94 | 18.27      | 0.84 | 46.89 | 5.89 | 46.40 |

|                          |                                            |       |      |       |       |       |      |       |      |       |
|--------------------------|--------------------------------------------|-------|------|-------|-------|-------|------|-------|------|-------|
| Yellow Locust            | <i>Robinia pseudoacacia L.</i>             | 1.176 | 0.90 | 78.93 | 20.16 | 18.77 | 1.37 | 45.37 | 6.05 | 47.22 |
| Maple                    | <i>Acer mono Maxim.</i>                    | 0.949 | 1.80 | 86.12 | 12.08 | 19.03 | 0.18 | 47.73 | 6.10 | 46.00 |
| Bamboo                   | <i>Phyllostachys heterocyclus(Carr.)</i>   | 0.912 | 0.51 | 84.94 | 14.55 | 18.33 | 0.26 | 48.75 | 5.98 | 45.02 |
| Oak                      | <i>Quercus mongolica</i>                   | 1.114 | 1.85 | 78.33 | 19.82 | 19.00 | 0.30 | 47.42 | 6.15 | 46.14 |
| Willow                   | <i>Salix babylonica</i>                    | 0.551 | 1.41 | 82.84 | 15.75 | 16.99 | 0.23 | 47.39 | 6.14 | 46.25 |
| Paulownia tomentosa      | <i>P.tomentosa (Thunb.) Steud.</i>         | 0.284 | 0.30 | 85.03 | 14.67 | 16.00 | 0.13 | 48.76 | 6.11 | 45.02 |
| Toon                     | <i>Ailanthus altissima</i>                 | 0.734 | 1.49 | 82.94 | 15.57 | 17.28 | 0.18 | 47.71 | 6.13 | 45.99 |
| White Birch              | <i>Betula platyphylla Suk</i>              | 0.798 | 0.39 | 87.45 | 12.17 | 20.22 | 0.21 | 48.33 | 6.20 | 45.28 |
| Ribbed Birch             | <i>Betula dahurica Pall.</i>               | 1.059 | 5.05 | 84.08 | 10.87 | 18.14 | 0.19 | 48.41 | 6.22 | 45.19 |
| Paulownia elongata       | <i>P. elongata S. Y. Hu</i>                | 0.763 | 0.34 | 81.68 | 17.98 | 19.33 | 0.08 | 48.85 | 6.09 | 44.98 |
| Black (Italian) Poplar   | <i>Populus nigra L.</i>                    | 1.080 | 1.53 | 77.11 | 21.36 | 18.93 | 0.32 | 47.45 | 6.06 | 46.18 |
| China Aspen              | <i>Populus adenopoda Maxim.</i>            | 0.867 | 1.45 | 81.89 | 16.67 | 19.33 | 0.38 | 47.42 | 6.08 | 46.14 |
| Chinaberry               | <i>Melia azedarach</i>                     | 0.654 | 2.07 | 76.95 | 20.98 | 17.67 | 0.46 | 48.72 | 5.93 | 44.89 |
| Jujube                   | <i>Ziziphus jujuba Mill.</i>               | 0.805 | 0.88 | 79.81 | 19.30 | 18.61 | 0.59 | 47.19 | 6.03 | 46.20 |
| Persimmon                | <i>Diospyros kaki Thunb.</i>               | 0.710 | 1.71 | 79.56 | 18.72 | 18.05 | 0.30 | 46.52 | 5.94 | 47.25 |
| Mulberry                 | <i>Morus alba L.</i>                       | 0.909 | 1.37 | 77.13 | 21.50 | 18.73 | 0.20 | 48.27 | 6.01 | 45.52 |
| Peach                    | <i>Prunus persica</i>                      | 0.770 | 3.81 | 77.79 | 18.40 | 19.35 | 0.26 | 48.10 | 6.01 | 45.65 |
| Lespedeza                | <i>Leapedeza bicolor. Turcz</i>            |       | 4.60 | 81.08 | 14.32 |       |      | 48.59 |      |       |
| Buxus sinica             | <i>Buxus sinica (Rehd. et Wils.) Cheng</i> |       | 5.84 | 78.36 | 15.80 |       |      | 48.19 |      |       |
| Holly                    | <i>Buxus megistophylla Lévl</i>            |       | 8.56 | 77.58 | 13.86 |       |      | 45.85 |      |       |
| <b>Fir</b>               | <i>Cunninghamia lanceolata</i>             | 0.427 | 0.42 | 82.94 | 16.64 | 18.61 | 0.13 | 49.83 | 6.18 | 43.87 |
| <b>Larch</b>             | <i>Larix gmelini (Rupr.) Rupr.</i>         | 0.634 | 0.46 | 82.10 | 17.44 | 19.22 | 0.14 | 48.23 | 6.20 | 45.44 |
| <b>Water Chinese fir</b> | <i>Metasequoia glyptostroboides</i>        | 0.410 | 0.71 | 79.91 | 19.38 | 19.49 | 0.29 | 49.42 | 6.07 | 44.22 |
| <b>Cypress</b>           | <i>Cupressus funebris Endl.</i>            | 0.667 | 1.47 | 76.60 | 21.93 | 20.02 | 0.36 | 50.13 | 6.02 | 43.49 |
| <b>Chinese Pine</b>      | <i>Pinus tabulaeformis Carr.</i>           | 0.443 | 0.25 | 84.77 | 14.98 | 18.51 | 0.18 | 49.10 | 6.32 | 44.41 |

**Table S4** Measured combustion/sampling durations, temperatures, and calculated burning rates (R) and modified combustion efficiencies (MCE).

| <b>COAL</b>            | <b>Duration, min</b> | <b>Temperature, °C</b> | <b>MCE, %</b> | <b>R, g/min</b> |
|------------------------|----------------------|------------------------|---------------|-----------------|
| BJ                     | 40-50                |                        | 88.0±0.0      | 12.7±1.7        |
| TY-A                   | 144-167              |                        | 91.3±5.1      | 3.99±0.35       |
| TY-B                   | 216-310              |                        | 90.4±4.6      | 4.37±1.13       |
| YL-A                   | 132-166              |                        | 82.8±2.0      | 4.03±0.60       |
| YL-B                   | 205-274              |                        | 94.1±0.7      | 2.86±0.44       |
| <b>Crop Residue</b>    |                      |                        |               |                 |
| Horsebean              | 16-19                | 450-658                | 92.4±0.5      | 18.3±1.5        |
| Peanut                 | 21                   | 400-650                | 88.70         | 19.9            |
| Soybean                | 20-22                | 436-679                | 95.0±0.1      | 26.9±1.4        |
| Cotton                 | 26-29                | 525-756                | 95.5±0.2      | 24.3±1.2        |
| Rice                   | 15-17                | 450-660                | 85.8±0.1      | 33.9±1.6        |
| Wheat                  | 14-17                | 495-650                | 91.2±0.2      | 12.5±1.4        |
| Rape                   | 10-14                | 600-680                | 89.3±1.1      | 20.2±3.4        |
| Seasame                | 15-17                | 500-650                | 94.2±4.0      | 13.4±1.7        |
| Corn                   | 24-26                | 480-750                | 93.9±1.6      | 17.9±4.5        |
| Broomcorn              | 20-24                | 440-620                | 96.6±0.0      | 23.4±7.1        |
| Pea straw              | 23-24                | 400-530                | 96.2±2.5      | 23.9±0.0        |
| <b>WOOD</b>            |                      |                        |               |                 |
| Chinese White Poplar   | 32-52                | 590-680                | 94.7±0.9      | 24.5±2.0        |
| Elm                    | 28-35                | 525-776                | 95.6±0.1      | 22.5±2.2        |
| Yellow Locust          | 48-54                | 400-700                | 93.7±0.1      | 46.6±5.9        |
| Maple                  | 40-46                | 350-580                | 95.7±0.2      | 43.4±3.1        |
| Bamboo                 | 25-31                | 337-720                | 95.2±0.9      | 33.4±4.0        |
| Oak                    | 32-37                | 350-483                | 95.0±0.4      | 31.3±2.8        |
| Willow                 | 43-47                | 610-737                | 95.1±0.2      | 28.7±1.3        |
| Paulownia tomentosa    | 35-37                | 420-690                | 94.8±0.3      | 28.5±0.8        |
| Toon                   | 35-45                | 250-743                | 95.4±0.3      | 25.6±3.4        |
| White Birch            | 36-41                | 533-710                | 93.6±0.7      | 27.0±1.5        |
| Ribbed Birch           | 53-54                | 520-696                | 95.6±0.3      | 44.7±0.5        |
| Paulownia elongata     | 35-50                | 200-383                | 88.6±0.6      | 30.8±6.5        |
| Black (Italian) Poplar | 40-44                | 240-450                | 93.5±0.0      | 41.0±0.0        |
| China Aspen            | 54-55                | 250-400                | 94.3±0.6      | 35.8±2.4        |
| Chinaberry             | 37-42                | 250-570                | 92.2±1.2      | 32.5±2.3        |
| Jujube                 | 42-45                | 280-680                | 92.9±0.3      | 26.1±1.0        |
| Persimmon              | 55-57                | 200-710                | 93.5±0.1      | 22.1±0.0        |
| Mulberry               | 49-58                | 370-494                | 93.9±0.6      | 20.6±1.4        |
| Peach                  | 39-44                | 242-700                | 94.6±0.1      | 25.5±1.7        |
| Lespedeza              | 20-27                | 370-780                | 94.4±0.1      | 53.0±8.5        |
| Buxus sinica           | 29-31                | 430-657                | 94.8±0.5      | 33.1±1.0        |
| Holly                  | 31-47                | 375-786                | 95.8±0.7      | 25.6±3.8        |
| Fir                    | 32-35                | 453-620                | 96.0±0.3      | 29.5±1.5        |
| Larch                  | 34-35                | 300-720                | 95.8±0.3      | 28.5±0.5        |
| Water Chinese fir      | 30-32                | 320-515                | 96.2±0.0      | 35.4±0.7        |
| Cypress                | 33-50                | 230-530                | 93.5±0.8      | 26.6±5.6        |
| Chinese Pine           | 47-66                | 330-738                | 94.1±1.6      | 36.9±6.2        |

**Table S5** Emission Factors of RET and ratios of RET/PHE for various solid fuels measured in this study and reported in the literature.

| Fuel Type                          | Combustion facility | EF, mg/kg         | RET/PHE | Reference                     |
|------------------------------------|---------------------|-------------------|---------|-------------------------------|
| <b>Softwood</b>                    |                     |                   |         |                               |
| pine wood                          | FP                  | 0.70              |         | <i>Simoneit et al., [1]</i>   |
| pine wood                          | FP                  | 9.90              | 0.60    | <i>Schauer et al., [2]</i>    |
| pine wood                          | FP                  | 0.68              | 1.45    | <i>Rogge et al., [3]</i>      |
| pine                               | FP                  | 0.49              |         | <i>Gullett et al., [4]</i>    |
| pine (Ponderosa pine, pinion pine) | FP                  | 1.79              | 0.17    | <i>McDonald et al., [5]</i>   |
| penderosa pine                     | FP                  | 18.9              | 66.04   | <i>Fine et al., [6]</i>       |
| pinyon pine                        | FP                  | 43.9              | 40.00   | <i>Fine et al., [6]</i>       |
| esatern white pine                 | FP                  | 45.9              | 34.94   | <i>Fine et al., [7]</i>       |
| loblolly pine                      | FP                  | 16.8              | 11.33   | <i>Fine et al., [8]</i>       |
| slash pine                         | FP                  | 9.01              | 48.27   | <i>Fine et al., [8]</i>       |
| <i>eastern hemlock</i>             | FP                  | 6.31              | 22.82   | <i>Fine et al., [7]</i>       |
| <i>white spruce</i>                | FP                  | 6.52              | 22.81   | <i>Fine et al., [6]</i>       |
| <i>balsam fir</i>                  | FP                  | 3.79              | 10.16   | <i>Fine et al., [7]</i>       |
| <i>douglas fir</i>                 | FP                  | +                 |         | <i>Fine et al., [6]</i>       |
| apache pine                        |                     | 25.00             | 12.06   | <i>Oros et al., [9]</i>       |
| eastern white pine                 |                     | 25.339            | 6.04    | <i>Oros et al., [9]</i>       |
| lodgepole pine                     |                     | 4.165             | 2.82    | <i>Oros et al., [9]</i>       |
| montezuma pine                     |                     | 25.043            | 3.26    | <i>Oros et al., [9]</i>       |
| pacific pine                       |                     | 7.797             | 10.49   | <i>Oros et al., [9]</i>       |
| western white pine                 |                     | 34.717            | 17.35   | <i>Oros et al., [9]</i>       |
| <i>california redwood</i>          |                     | 0.274             | 0.43    | <i>Oros et al., [9]</i>       |
| <i>douglas fir</i>                 |                     | 6.51              | 4.40    | <i>Oros et al., [9]</i>       |
| <i>moutain hemlock</i>             |                     | 0.573             | 0.07    | <i>Oros et al., [9]</i>       |
| <i>noble fir</i>                   |                     | 0.963             | 2.43    | <i>Oros et al., [9]</i>       |
| <i>pacific silver fir</i>          |                     | 3.842             | 0.51    | <i>Oros et al., [9]</i>       |
| <i>sitka spruce</i>                |                     | 2.634             | 3.68    | <i>Oros et al., [9]</i>       |
| pinus pinaster                     | WS                  | 4.18              | 8.17    | <i>Goncalves et al., [10]</i> |
| loblolly pine                      | WS, no catalytic    | 3.39              | 6.64    | <i>Fine et al., [11]</i>      |
| <i>douglas fir</i>                 | WS, no catalytic    | 1.70              | 2.06    | <i>Fine et al., [11]</i>      |
| Pine                               | WS                  | 0.84 <sup>#</sup> | 6.46    | <i>Bari et al., [12]</i>      |
| <i>spruce</i>                      | WS, 0.4 kg/h        | 1113 <sup>#</sup> | 1.64    | <i>Ramdahl et al., [13]</i>   |
| <i>spruce</i>                      | WS, 3.1 kg/h        | 16 <sup>#</sup>   | 0.19    | <i>Ramdahl et al., [13]</i>   |
| <i>spruce</i>                      | boiler, 40kg/h      | 1420 <sup>#</sup> | 0.29    | <i>Ramdahl et al., [13]</i>   |
| <i>spruce</i>                      | boiler, 40kg/h      | 360 <sup>#</sup>  | 0.11    | <i>Ramdahl et al., [13]</i>   |
| pine wood                          | burning furance     | 82 <sup>#</sup>   | 1.46    | <i>Kozinski et al., [14]</i>  |
| pine                               | WS-hot              | 15.4*             | 148.08  | <i>Goncalves et al., [15]</i> |
| pine                               | WS-cold             | 4.12*             | 20.70   | <i>Goncalves et al., [15]</i> |
| pine                               | FP-fot              | 1.54*             | 39.59   | <i>Goncalves et al., [15]</i> |
| pine                               | FP-cold             | 6.43*             | 17.33   | <i>Goncalves et al., [15]</i> |
| <i>douglas fir</i>                 | WS, yes catalytic   | 3.52              | 4.34    | <i>Fine et al., [11]</i>      |
| <i>Fir</i>                         | Residential Stove   | 0.07              | 0.04    | <i>this study</i>             |
| Larch                              | Residential Stove   | 0.29              | 0.27    | <i>this study</i>             |
| <i>Water Chinese fir</i>           | Residential Stove   | 0.13              | 0.07    | <i>this study</i>             |
| <i>Cypress</i>                     | Residential Stove   | 0.14              | 0.10    | <i>this study</i>             |
| Chinese pine                       | Residential Stove   | 0.34              | 0.28    | <i>this study</i>             |
| <b>Hardwood</b>                    |                     |                   |         |                               |

|                                  |                   |                   |       |                               |
|----------------------------------|-------------------|-------------------|-------|-------------------------------|
| oak                              | FP                | 0.10              |       | <i>Simoneit et al., [1]</i>   |
| oak                              | FP                | 2.33              | 0.25  | <i>Schauer et al., [2]</i>    |
| eucalyptus                       | FP                | 0.15              | 0.02  | <i>Schauer et al., [2]</i>    |
| oak                              | FP                | 0.11              | 0.37  | <i>Rogge et al., [3]</i>      |
| oak mixed cottonwood birch aspen | FP                | 0.50              | 0.03  | <i>McDonald et al., [5]</i>   |
| oak                              | FP                | ND                |       | <i>Gullett et al., [4]</i>    |
| white oak_hw                     | FP                | +                 |       | <i>Fine et al., [6]</i>       |
| sugar maple                      | FP                | +                 |       | <i>Fine et al., [6]</i>       |
| black oak                        | FP                | +                 |       | <i>Fine et al., [6]</i>       |
| american beech                   | FP                | +                 |       | <i>Fine et al., [6]</i>       |
| black cherry                     | FP                | +                 |       | <i>Fine et al., [6]</i>       |
| quaking aspen                    | FP                | +                 |       | <i>Fine et al., [6]</i>       |
| red maple                        | FP                | +                 |       | <i>Fine et al., [7]</i>       |
| nirthern red oak                 | FP                | +                 |       | <i>Fine et al., [7]</i>       |
| paper birch                      | FP                | +                 |       | <i>Fine et al., [7]</i>       |
| yellow polar                     | FP                | +                 |       | <i>Fine et al., [8]</i>       |
| white ash                        | FP                | +                 |       | <i>Fine et al., [8]</i>       |
| sweetgum                         | FP                | +                 |       | <i>Fine et al., [8]</i>       |
| mockernut hickory                | FP                | +                 |       | <i>Fine et al., [8]</i>       |
| oak                              | WS                | ND                |       | <i>Gullett et al., [4]</i>    |
| Eucalyptus                       | WS                | 0.09              | 3.84  | <i>Goncalves et al., [10]</i> |
| quercus suber_cork oak           | WS                | 0.17              | 1.19  | <i>Goncalves et al., [10]</i> |
| acacia lognifolia_Acacia         | WS                | 0.04              | 22.37 | <i>Goncalves et al., [10]</i> |
| birch                            | WS                | <0.1              |       | <i>Hedberg et al., [16]</i>   |
| oak mixed cottonwood birch aspen | WS                | 0.02              | 0.00  | <i>McDonald et al., [5]</i>   |
| red maple                        | WS, no catalytic  | 0.00              | 0.01  | <i>Fine et al., [11]</i>      |
| white oak                        | WS, no catalytic  | 0.03              | 0.09  | <i>Fine et al., [11]</i>      |
| white oak                        | WS, yes catalytic | 0.01              | 0.04  | <i>Fine et al., [11]</i>      |
| sugar maple                      | WS, no catalytic  | 0.01              | 0.04  | <i>Fine et al., [11]</i>      |
| Beech                            | WS                | 0.17 <sup>#</sup> | 4.25  | <i>Bari et al., [12]</i>      |
| golden wattle                    | WS-hot            | 0.16*             | 0.95  | <i>Goncalves et al., [15]</i> |
| golden wattle                    | WS-cold           | 0.44*             | 1.92  | <i>Goncalves et al., [15]</i> |
| golden wattle                    | FP-fot            | 0.28*             | 4.07  | <i>Goncalves et al., [15]</i> |
| golden wattle                    | FP-cold           | 0.049*            | 0.28  | <i>Goncalves et al., [15]</i> |
| oak                              | WS-hot            | 0.15*             | 1.31  | <i>Goncalves et al., [15]</i> |
| oak                              | WS-cold           | 0.36*             | 0.90  | <i>Goncalves et al., [15]</i> |
| oak                              | FP-hot            | 0.023*            | 0.04  | <i>Goncalves et al., [15]</i> |
| oak                              | FP-cold           | 0.035*            | 0.31  | <i>Goncalves et al., [15]</i> |
| eucalypt                         | WS-hot            | 0.10*             | 1.45  | <i>Goncalves et al., [15]</i> |
| eucalypt                         | WS-cold           | 0.12*             | 0.41  | <i>Goncalves et al., [15]</i> |
| eucalypt                         | FP-cold           | 0.084*            | 0.95  | <i>Goncalves et al., [15]</i> |
| Chinese white poplar             | Residential Stove | 0.07              | 0.04  | <i>this study</i>             |
| Elm                              | Residential Stove | 0.04              | 0.02  | <i>this study</i>             |
| Yellow Locust                    | Residential Stove | 0.07              | 0.09  | <i>this study</i>             |
| Maple                            | Residential Stove | 0.06              | 0.04  | <i>this study</i>             |
| bamboo                           | Residential Stove | 0.08              | 0.02  | <i>this study</i>             |
| OAK                              | Residential Stove | 0.13              | 0.12  | <i>this study</i>             |
| Willow                           | Residential Stove | 0.09              | 0.16  | <i>this study</i>             |
| Paulownia tomentosa              | Residential Stove | 0.16              | 0.17  | <i>this study</i>             |
| Toon                             | Residential Stove | 0.05              | 0.06  | <i>this study</i>             |

|                                  |                        |        |      |                               |
|----------------------------------|------------------------|--------|------|-------------------------------|
| white birch                      | Residential Stove      | 0.08   | 0.05 | <i>this study</i>             |
| Lespedeza                        | Residential Stove      | 0.04   | 0.00 | <i>this study</i>             |
| Holly                            | Residential Stove      | 0.09   | 0.01 | <i>this study</i>             |
| Buxus sinica                     | Residential Stove      | 0.04   | 0.01 | <i>this study</i>             |
| Ribbed birch                     | Residential Stove      | 0.02   | 0.01 | <i>this study</i>             |
| Paulownia Elongata               | Residential Stove      | 0.05   | 0.02 | <i>this study</i>             |
| Black poplar                     | Residential Stove      | 0.15   | 0.04 | <i>this study</i>             |
| China Aspen                      | Residential Stove      | 0.02   | 0.01 | <i>this study</i>             |
| Chinaberry                       | Residential Stove      | 0.15   | 0.06 | <i>this study</i>             |
| Jujube tree                      | Residential Stove      | 0.04   | 0.02 | <i>this study</i>             |
| Persimmon tree                   | Residential Stove      | 0.08   | 0.04 | <i>this study</i>             |
| Mulberry tree                    | Residential Stove      | 0.06   | 0.02 | <i>this study</i>             |
| Peach tree                       | Residential Stove      | 0.06   | 0.03 | <i>this study</i>             |
| <b>Crop Residue</b>              |                        |        |      |                               |
| rice                             | simulated open burning | 0.90   | 3.26 | <i>Hays et al., [17]</i>      |
| wheat                            | simulated open burning | 0.01   | 0.48 | <i>Hays et al., [17]</i>      |
| Broomcorn                        | Residential Stove      | 0.10   | 0.05 | <i>this study</i>             |
| Pea straw                        | Residential Stove      | 0.08   | 0.02 | <i>this study</i>             |
| Horsebean                        | Residential Stove      | 0.10   | 0.01 | <i>this study</i>             |
| Peanut straw                     | Residential Stove      | 0.13   | 0.02 | <i>this study</i>             |
| Soybean straw                    | Residential Stove      | 0.05   | 0.01 | <i>this study</i>             |
| Cotton stalk                     | Residential Stove      | 0.05   | 0.02 | <i>this study</i>             |
| Rice straw                       | Residential Stove      | 0.12   | 0.01 | <i>this study</i>             |
| Wheat straw                      | Residential Stove      | 0.21   | 0.01 | <i>this study</i>             |
| Rape straw                       | Residential Stove      | 0.37   | 0.02 | <i>this study</i>             |
| Seasame straw                    | Residential Stove      | 0.17   | 0.02 | <i>this study</i>             |
| Corn straw                       | Residential Stove      | 0.18   | 0.03 | <i>this study</i>             |
| <b>Coal</b>                      |                        |        |      |                               |
| Lignite                          |                        | 101.00 | 0.78 | <i>Oros and Simoneit [18]</i> |
| Sub-bituminous                   |                        | 282.00 | 1.86 | <i>Oros and Simoneit [18]</i> |
| Briquette-anthracite             | Residential Stove      | 2.17   | 1.76 | <i>this study</i>             |
| briquette-bituminous             | Residential Stove      | 3.68   | 1.29 | <i>this study</i>             |
| Chunk-bituminous                 | Residential Stove      | 30.15  | 1.45 | <i>this study</i>             |
| Chunk-bituminous                 | Residential Stove      | 186.90 | 6.10 | <i>this study</i>             |
| Chunk-bituminous                 | Residential Stove      | 30.31  | 3.07 | <i>this study</i>             |
| <b>Synthetic logs</b>            |                        |        |      |                               |
| synthetic logs (pine mountain)   | FP                     | 2.72   | 5.91 | <i>Rogge et al., [3]</i>      |
| synthetic log                    | FP                     | 0.39   | 0.05 | <i>McDonald et al., [5]</i>   |
| artificial log (wax and sawdust) | FP                     | 10.96  |      | <i>Gullett et al., [4]</i>    |

# unit:  $\mu\text{g}/\text{m}^3$ ; \* unit:  $\text{mg}/\text{g}$  OC ; ND: not detected; +: detected but not quantified

FP: fireplace, WD: woodstove,

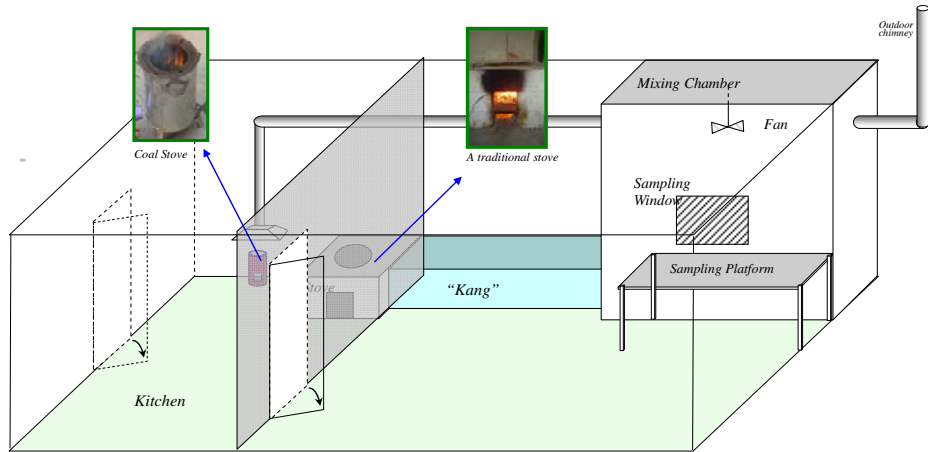

Figure S1. Layout of the kitchen and stoves in the combustion emission experiments.

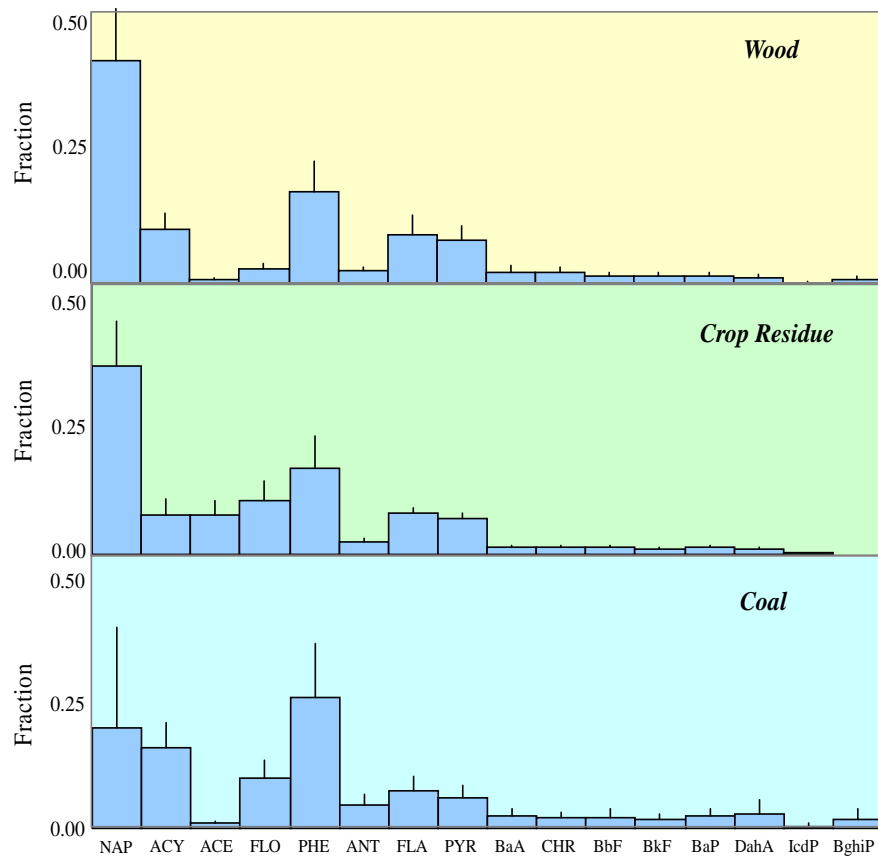

Figure S2. Composition profiles of 16 EPA priority PAHs in indoor air from residential crop residue, wood and coal combustion<sup>19-20</sup>.



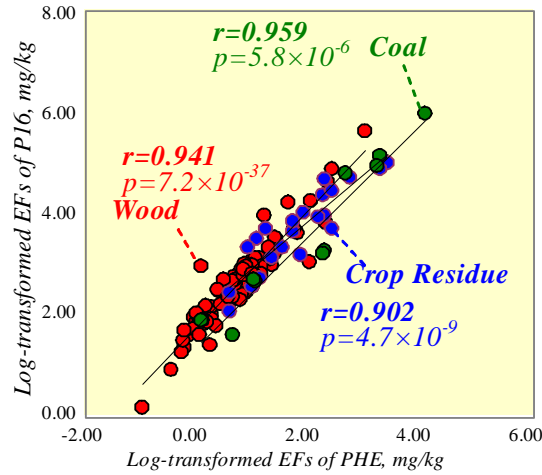

Figure S3. Correlation between the log-transformed EFs of PHE and those of total 16 EPA priority PAHs (P16) from residential wood, crop residue, and coal combustion.

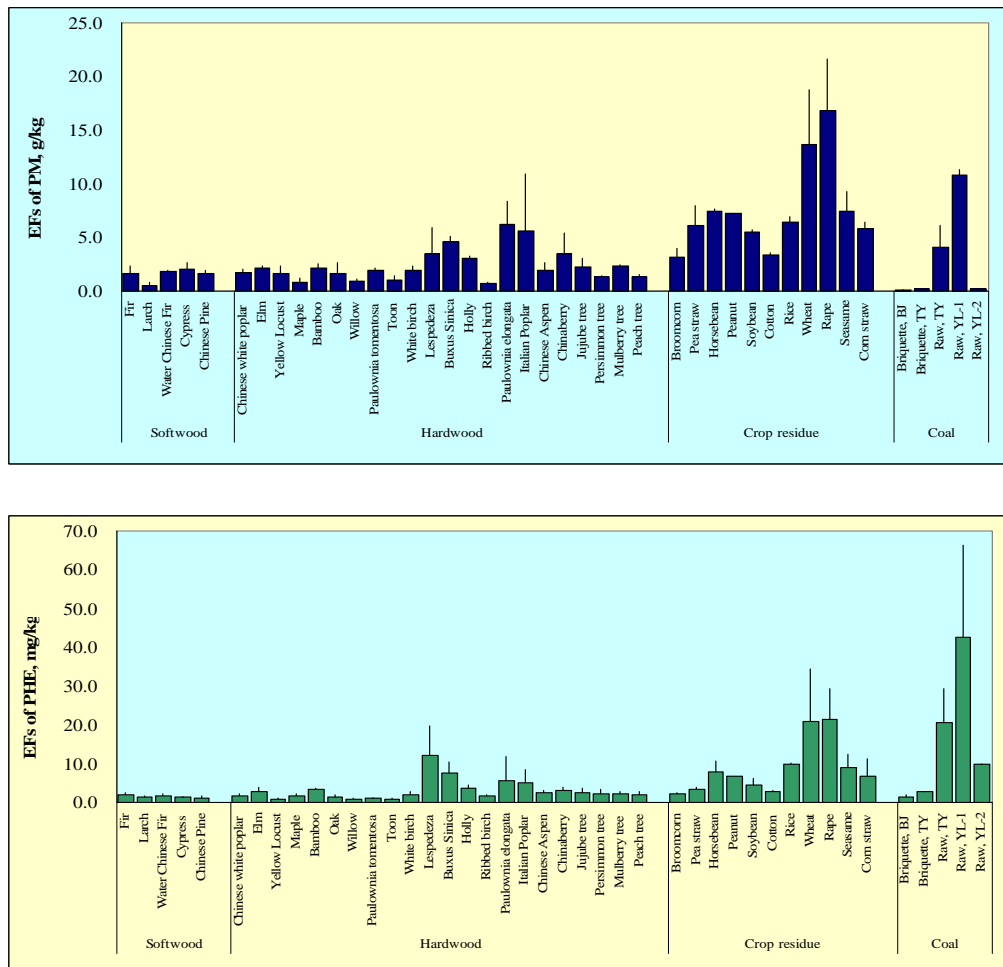

Figure S4. The measured PM and PHE EFs in dry basis for wood, crop residue, and coal combustions. The results are presented in arithmetic means and standard deviations<sup>19-20</sup>.

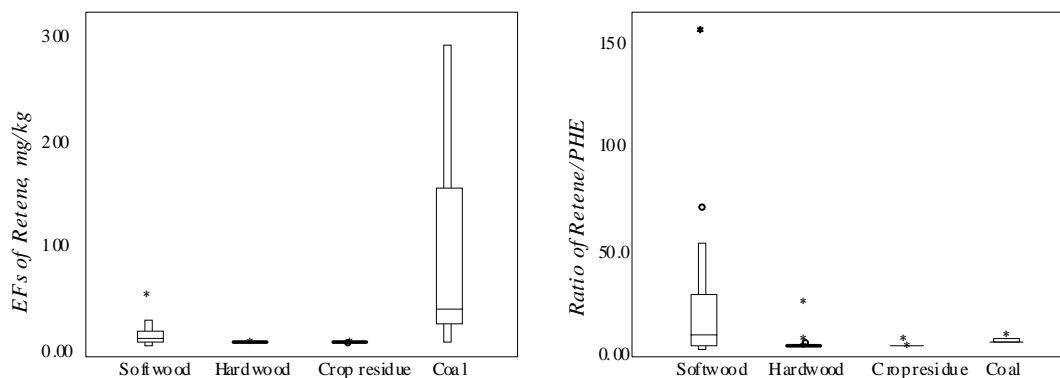

**Figure S5.**  $EF_{RET}$  (mg/kg, dry basis) and ratios of  $EF_{RET}/EF_{PHE}$  for simultaneously measured RET and PHE from softwood, hardwood, crop residue, and coal combustion. Data used include those measured in this study and those collected from the literature (Table S5).

## References

- (1) Simoneit, B. R. T.; Rogge, W. F.; Mazurek, M. A.; Standley, L. J.; Hildemann, L. M.; Cass, G. R. Lignin pyrolysis products, lignans, and resin acids as specific tracers of plant classes in emissions from biomass combustion. *Environ. Sci. Technol.* **1993**, *27*, 2533-2541.
- (2) Schauer, J. J.; Kleeman, M. J.; Cass, G. R.; Simoneit, B. R. T. Measurement of emissions from air pollution sources. 3.  $C_1$ - $C_{22}$  organic compounds from fireplace combustion of wood. *Environ. Sci. Technol.* **2001**, *35*, 1716-1728.
- (3) Rogge, W. F.; Hildemann, L. M.; Mazurek, M. A.; Cass, G. R.; Simoneit, B. R. T. Sources of fine organic aerosol. 9. pine, oak and synthetic log combustion in residential fireplaces. *Environ. Sci. Technol.* **1998**, *32*, 13-22.
- (4) Gullett, B. K.; Touati, A.; Hays, M. D. PCDD/F, PCB, HxCBz, PAH, and PM emission factors for fireplaces and woodstove combustion in the San Francisco Bay region. *Environ. Sci. Technol.* **2003**, *37*, 1758-1765.
- (5) McDonald, J. D.; Zielinska, B.; Fugita, E. M.; Saebiel, J. C.; Chow, J. C.; Watson, J. G. Fine particle and gaseous emission rates from residential wood combustion. *Environ. Sci. Technol.* **2000**, *34*, 2080-2091.
- (6) Fine, P. M.; Cass, G. R.; Simoneit, B. R. T. Chemical characterization of fine particle emissions from fireplace combustion of wood types grown in the Midwestern and Western United States. *Environ. Eng. Sci.* **2004**, *21*, 387-409.
- (7) Fine, P. M.; Cass, G. R.; Simoneit, B. R. T. Chemical characterization of fine particle emissions from fireplace combustion of woods grown in the Northeastern United States. *Environ. Sci. Technol.* **2001**, *35*, 2665-2675.
- (8) Fine, P. M.; Cass, G. R.; Simoneit, B. R. T. Chemical characterization of fine particle emissions from fireplace combustion of woods grown in the Southern United States. *Environ. Sci. Technol.* **2002**, *36*, 1442-1451.
- (9) Oros, D. R.; Simoneit, B. R. T. Identification and emission factors of molecular tracers in organic aerosols from biomass burning Part 1. temperate climate conifers. *Applied Geochemistry* **2001**, *16*, 1513-1544.
- (10) Goncalves, C.; Alves, C.; Evtugina, M.; Mirante, F.; Pio, C.; Caseiro, A.; Schmidl, C.; Bauer, H.; Carvalho, F. Characterisation of PM10 emissions from woodstove combustion of common woods grown in Portugal. *Atmos. Environ.* **2010**, *44*, 4474-4480.
- (11) Fine, P. M.; Cass, G. R.; Simoneit, B. R. T. Chemical characterization of fine particle emissions from fireplace combustion of wood stove combustion of prevalent United States tree species. *Environ. Eng. Sci.* **2004**, *21*, 705-721.
- (12) Bari, M. A.; Baumbach, G.; Kuch, B.; Scheffknecht, G. Wood smoke as a source of particle-phase organic compounds in residential areas. *Atmos. Environ.* **2009**, *43*, 4722-4732.
- (13) Ramdahl, T. Retene – a molecular marker of wood combustion in ambient air. *Nature* **1983**, *306*, 580-582.

- (14) Kozinski, J. A.; Saade, R. Effect of biomass burning on the formation of soot particles and heavy hydrocarbons. An experimental study. *Fuel* **1998**, *77*, 225-237.
- (15) Goncalves, C.; Alves, C.; Fernandes, A. P.; Monteiro, C.; Tarelho, L.; Evtyugina, M.; Pio, C. Organic compounds in PM<sub>2.5</sub> emitted from fireplace and woodstove combustion of typical Portuguese wood species. *Atmos. Environ.* **2011**, *45*, 4533-4545.
- (16) Hedberg, E.; Kristensson, A.; Ohlsson, M.; Johansson, C.; Johansson, P.; Swietlicki, E.; Vesely, V.; Wideqvist, U.; Westerholm, R. Chemical and physical characterization of emissions from birch wood combustion in a wood stove. *Atmos. Environ.* **2002**, *36*, 4823-4837.
- (17) Hays, M. D.; Fine, P. M.; Geron, C. D.; Kleeman, M. J.; Gullett, B. K. Open burning of agricultural biomass: physical and chemical properties of particle-phase emissions. *Atmos. Environ.* **2005**, *39*, 6747-6764.
- (18) Oros, D. R.; Simoneit, B. R. T. Identification and emission rates of molecular tracers in coal smoke particulate matter. *Fuel* **2000**, *79*, 515-536.
- (19) Shen, G.; Wang, W.; Yang, Y.; Ding, J.; Xue, M.; Min, Y.; Zhu, C.; Shen, H.; Li, W.; Wang, B.; Wang, R.; Wang, X.; Tao, S.; Russell, A. G. Emissions of PAHs from indoor crop residue burning in a typical rural stove: emission factors, size distributions and gas-particle partitioning. *Environ. Sci. Technol.* **2011**, *45*, 1206-1212.
- (20) Shen, G.; Wang, W.; Yang, Y.; Zhu, C.; Min, Y.; Xue, M.; Ding, J.; Li, W.; Wang, B.; Shen, H.; Wang, R.; Wang, X.; Tao, S. Emission factors and particulate matter size distribution of polycyclic aromatic hydrocarbons from residential coal combustions in rural Northern China. *Atmos. Environ.* **2010**, *44*, 5237-5243.
